# Supplementary material for: Degradable ultrathin high-performance photocatalytic hydrogen generator from porous electrospun composite fiber membrane with enhanced light absorption ability
Source: Royal Society of Chemistry journal article supplement (doi:10.1039/d0ta12292k), 2021-01-01
Supplement: d0ta12292k1.pdf [file d0ta12292k1.pdf]

## Supporting Information

### **Degradable ultrathin high-performance photocatalytic hydrogen generator from porous electrospun composite fiber membrane with enhanced light absorption ability**

Qianyu Wang<sup>‡</sup>, Zhengmin Zhang<sup>‡</sup>, Lin Liu, Rui-Ying Bao, Ming-Bo Yang, Wei Yang\*

*College of Polymer Science and Engineering, Sichuan University, State Key Laboratory of Polymer Materials Engineering, No.24 South Section 1, Yihuan Road, Chengdu, 610065, Sichuan, People's Republic of China*

<sup>‡</sup>Qianyu Wang and Zhengmin Zhang contributed equally to this work.

\*Corresponding authors. Tel.: + 86 28 8546 0130; Fax: + 86 28 8546 0130

E-mail: [weiyang@scu.edu.cn](mailto:weiyang@scu.edu.cn) (W Yang)

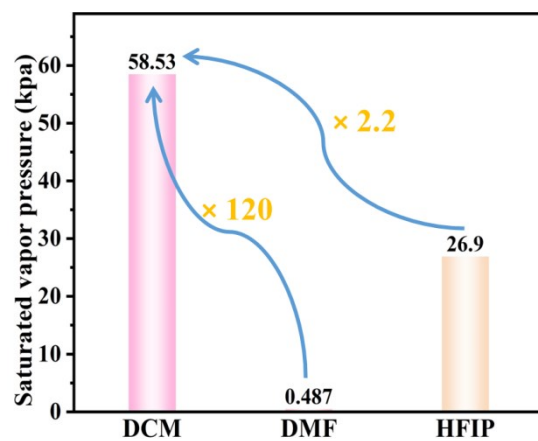

Fig. S1 Saturated vapor pressure of DCM, DMF and HFIP at 25 °C.

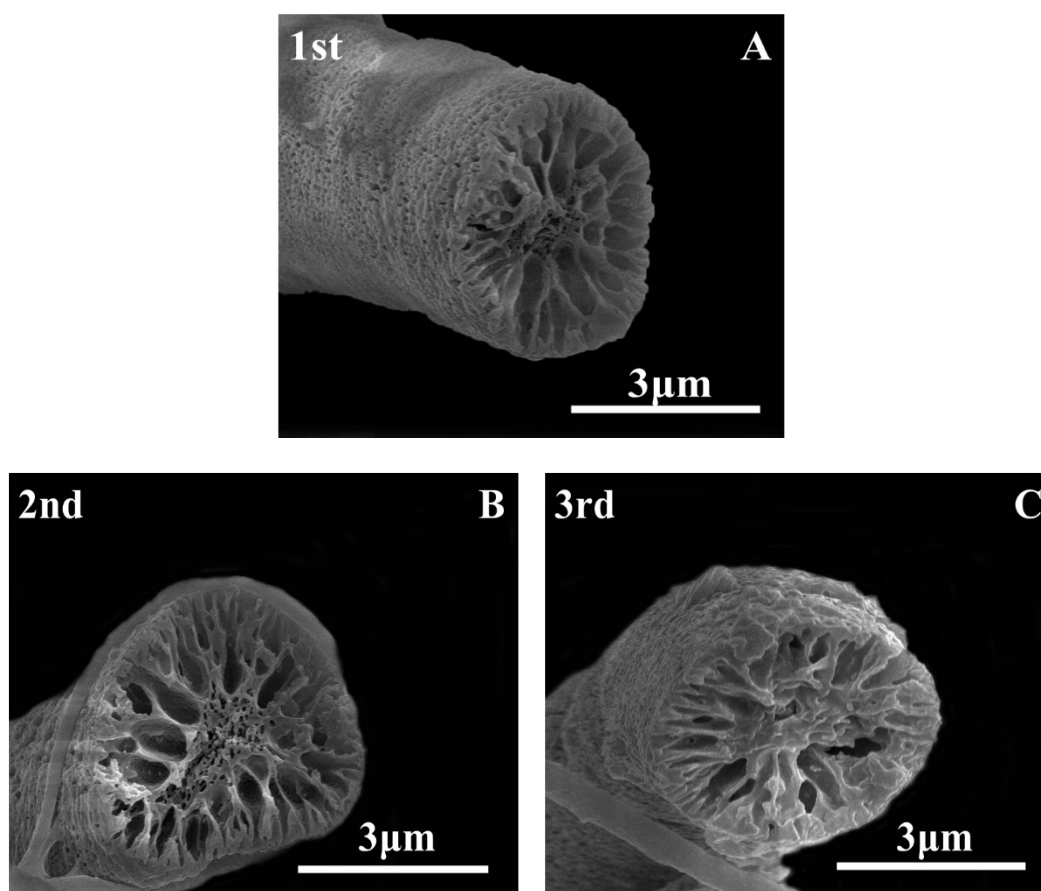

Fig. S2 SEM images of cross-section of repeatedly fabricate PT2 for the (A) first time, (B) second time and (C) third time.

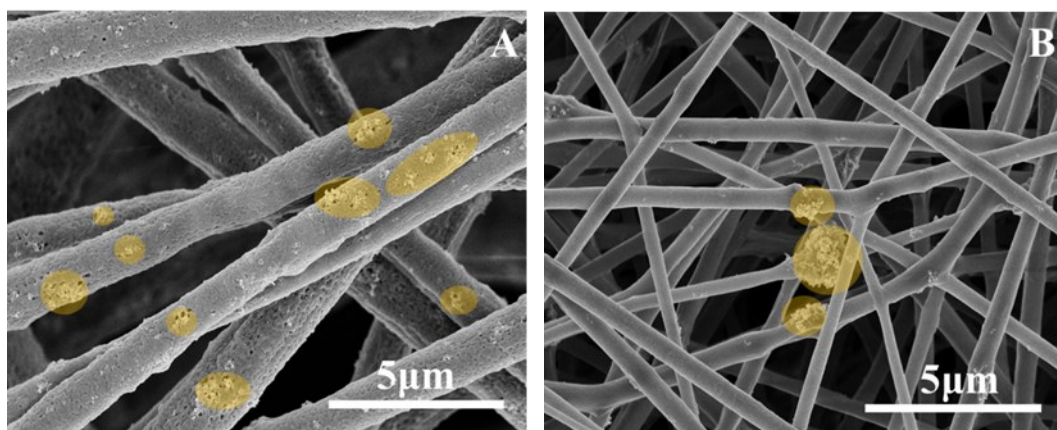

**Fig. S3** SEM images of (A) porous composite fiber with 10wt%  $\text{TiO}_2$  additive amount and (B) smooth solid composite fiber with 2wt%  $\text{TiO}_2$  additive amount.

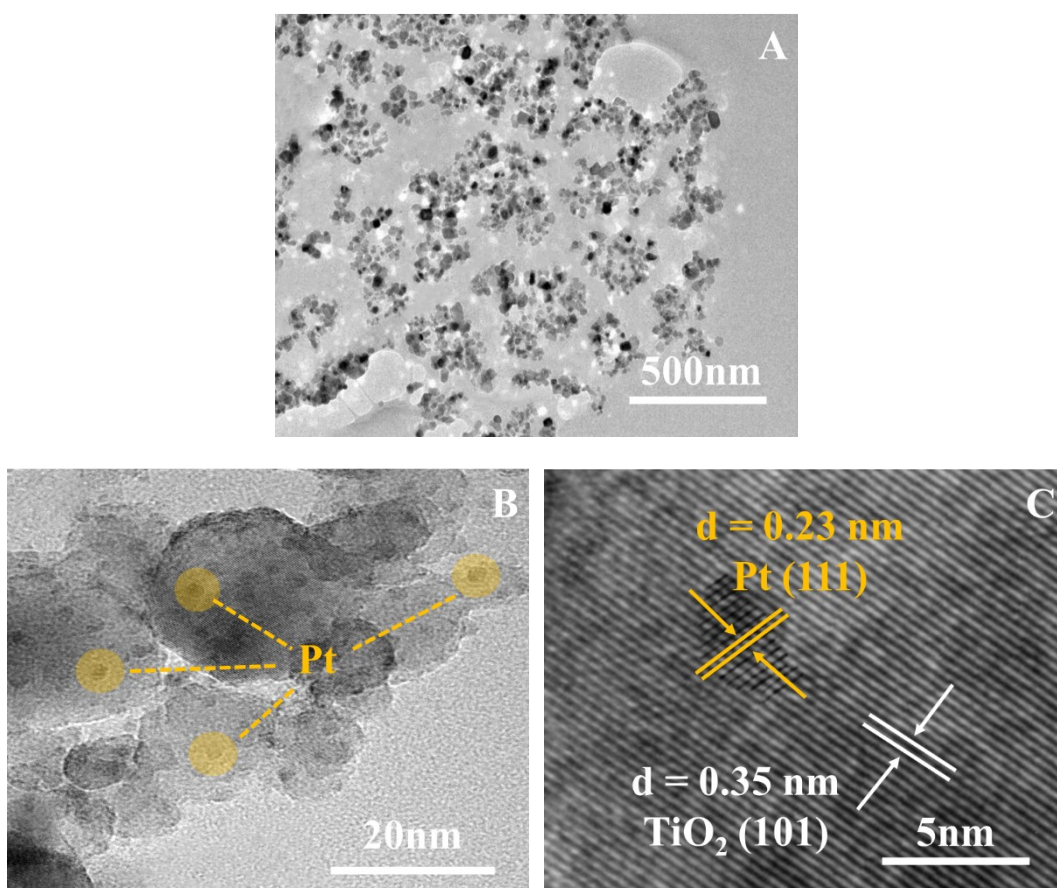

**Fig. S4** TEM images of (A) cross-section of PT2 and (B)  $\text{TiO}_2$ -Pt nanoparticles dropped out from PLA matrix. (C) HRTEM image of  $\text{TiO}_2$ -Pt nanoparticles. (the black dots in **Fig. S4B** are the Pt nanoparticles on  $\text{TiO}_2$  surface.)

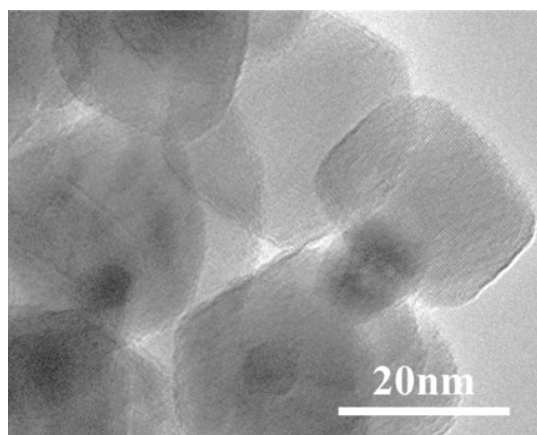

Fig. S5 TEM images of TiO<sub>2</sub> particles.

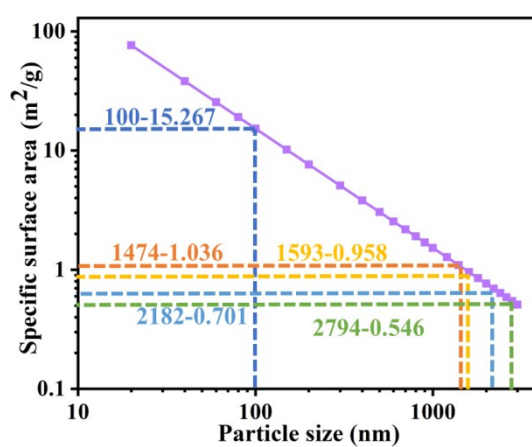

Fig. S6 The specific surface area of aqueous TiO<sub>2</sub> aggregate calculated by the size of aggregate from MLS test.

As shown in **Fig. S4**, the specific surface area and particle size is linear correlation under log-log coordinate. The specific surface area of TiO<sub>2</sub> aggregate with a size of 100nm is about 15 m<sup>2</sup>/g, less than 16 m<sup>2</sup>/g of PLA porous fiber, we can speculate that if the TiO<sub>2</sub> in the composites form some aggregates larger than 100nm, the specific surface areas of composites will decrease obviously.

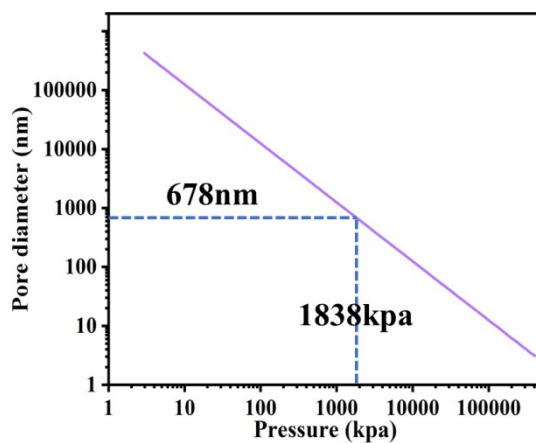

**Fig. S7** The pore diameter of porous PLA fibers calculated by the mercury injection pressure.

In the mercury injection test, larger pressure can press mercury into pore with smaller size, and the pore diameter and mercury injection pressure is linear correlation under log-log coordinate.

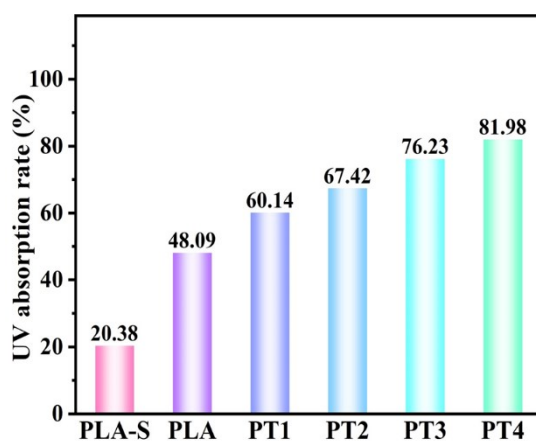

**Fig. S8** UV adsorption rate of the composite fiber membranes, PLA fiber membrane and smooth solid fiber control sample.

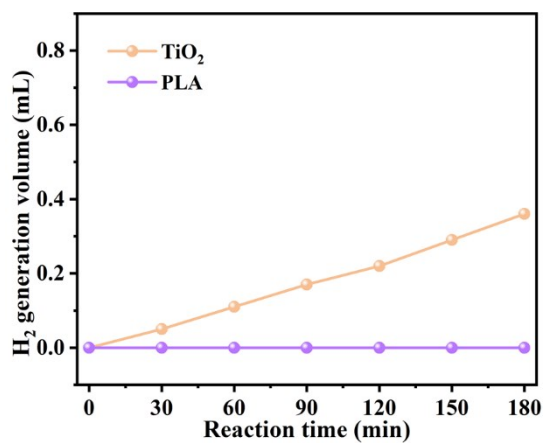

Fig. S9 Process of photocatalytic hydrogen production tests of TiO<sub>2</sub> and PLA samples.

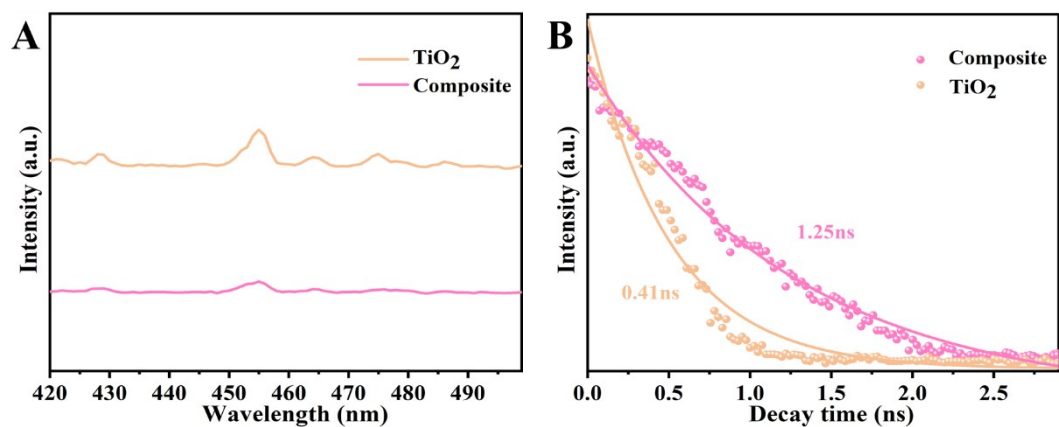

Fig. S10 (A) Photoluminescence (PL) spectrum and (B) time-resolution photoluminescence (TRPL) spectrum of TiO<sub>2</sub> and Pt loaded composite, the lifetime of photo-generated charges is obtain through data fitting.

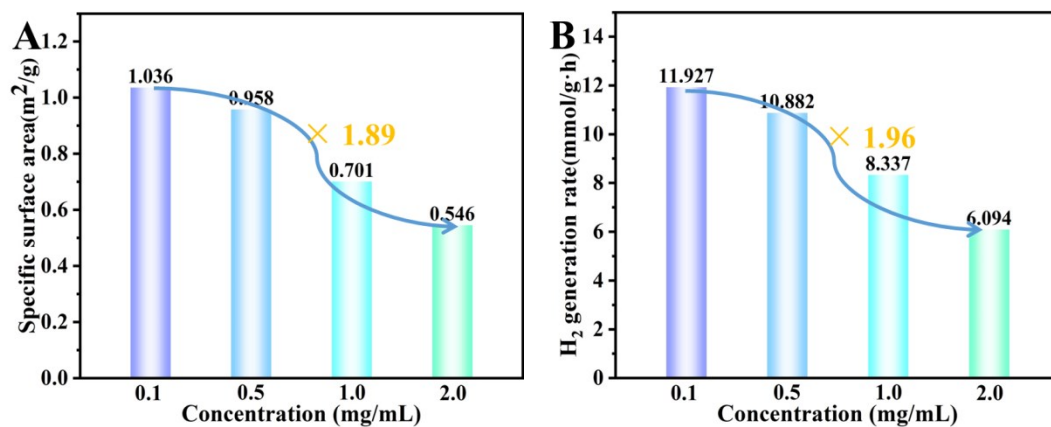

Fig. S11 (A) The specific surface areas of aqueous TiO<sub>2</sub> aggregates calculated by the size of aggregates from MLS test and (B) the hydrogen generation efficiency of these TiO<sub>2</sub> in aqueous reaction system.

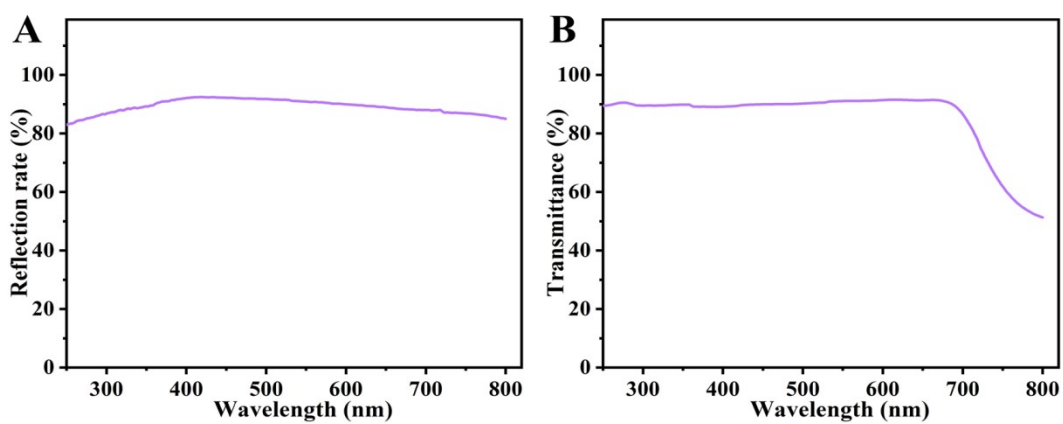

Fig. S12 (A) The reflection rate of used aluminum foil. (B) The transmittance of used PET membrane.

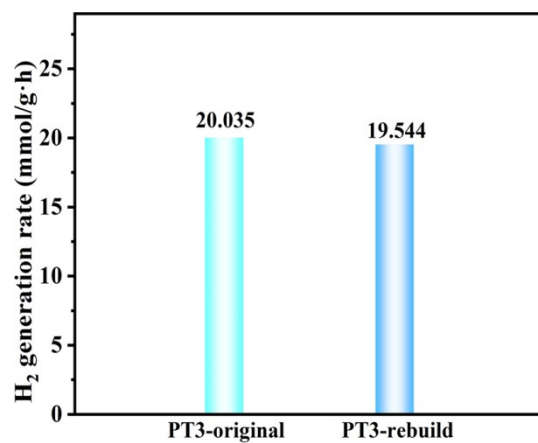

**Fig. S13** Photocatalytic hydrogen production performance of original PT3 and PT3 rebuild by using recycled TiO<sub>2</sub> after the degradation of original PLA carrier.
